# Supplementary material
Source: Research Square preprint supplement (doi:10.21203/rs.3.rs-9072003/v2)
Supplement: Supplementary file 1 [file a67d423e8097d354678fc54a.pdf]

**Supplementary Table S1.** Results of the unmeasured latent method construct (ULMC) analysis

| Model                         | $\chi^2$ | df  | CFI   | RMSEA | SRMR  | $\Delta$ CFI |
|-------------------------------|----------|-----|-------|-------|-------|--------------|
| Original measurement model T1 | 1156.869 | 116 | 0.877 | 0.138 | 0.041 |              |
| ULMC model T1                 | 1186.693 | 115 | 0.873 | 0.141 | 0.069 | -0.004       |
| Original measurement model T2 | 1158.028 | 116 | 0.871 | 0.138 | 0.037 |              |
| ULMC model T2                 | 1158.273 | 115 | 0.870 | 0.139 | 0.056 | -0.001       |
| Original measurement model T3 | 1071.283 | 116 | 0.902 | 0.132 | 0.031 |              |
| ULMC model T3                 | 1071.457 | 115 | 0.902 | 0.133 | 0.051 | 0.000        |

Note: (1) ULMC = unmeasured latent method construct; (2)  $\Delta$  CFI = change in CFI relative to the corresponding original measurement

model; (3) T1: Time 1; T2: Time 2; T3: Time 3.
